# Supplementary material
Source: publisher figshare collection journal article supplement (https://gsajournals.figshare.com/articles/dataset/_/23315162)
Supplement: Supplementary file 1 [file 1]

## File S1. The DCCT Genetic Study

### Characterization of direct and/or indirect genetic associations for multiple traits in longitudinal studies of disease progression

Myriam Brossard,<sup>\*,1</sup> Andrew D. Paterson,<sup>†,‡</sup> Osvaldo Espin-Garcia,<sup>‡,\*\*,§§</sup> Radu V. Craiu,<sup>\*\*</sup> Shelley B. Bull<sup>\*,‡,1</sup>

<sup>\*</sup>Lunenfeld-Tanenbaum Research Institute, Sinai Health, Toronto, M5T 3L9, Ontario, Canada;

<sup>†</sup>Program in Genetics and Genome Biology, Hospital for Sick Children Research Institute, M5G 1X8, Toronto, Ontario, Canada;

<sup>‡</sup>Division of Biostatistics, Dalla Lana School of Public Health, University of Toronto, M5T 3M7, Toronto, Ontario, Canada;

<sup>§</sup>Department of Biostatistics, Princess Margaret Cancer Centre, M5G 2C1, Toronto, Ontario, Canada;

<sup>\*\*</sup>Department of Statistical Sciences, University of Toronto, M5S 3G3, Toronto, Ontario, Canada;

<sup>§§</sup>Department of Epidemiology and Biostatistics, Western University, N6A 5C1, London, Ontario, Canada.

<sup>1</sup>**Corresponding authors:** Lunenfeld-Tanenbaum Research Institute, 60 Murray Street, Box #18, M5T 3L9, Toronto, Ontario, Canada. E-mails: [bull@lunenfeld.ca](mailto:bull@lunenfeld.ca), [brossard@lunenfeld.ca](mailto:brossard@lunenfeld.ca). Phone number: +1 416-586-5052.

### [Table of Contents](#)

|                                                                                        |   |
|----------------------------------------------------------------------------------------|---|
| The Diabetes Control and Complications Trial (DCCT) data .....                         | 2 |
| List of the participants of the DCCT/EDIC Research Group (as of January 1, 2021) ..... | 4 |
| Cited literature .....                                                                 | 8 |

## **The Diabetes Control and Complications Trial (DCCT) data**

The DCCT data was a randomized-controlled trial that demonstrated that intensive insulin therapy could prevent and/or delay progression of long-term T1DC (The Diabetes Control and Complications Trial Research Group 1993). A total of 1,441 T1D patients were recruited between 1983 and 1993 in two cohorts: a primary prevention cohort (726 patients with a short duration of diabetes (1-5 years), exhibiting normal albuminuria (Albumin Excretion Rate (AER) <40 mg/day) and without evidence of retinopathy); a secondary intervention cohort (715 patients with diabetes duration of 1-15 years, with AER<200 mg/day and non-proliferative retinopathy). Members of each cohort were randomly assigned to receive either conventional or intensive insulin treatment and were followed over scheduled visits for the development of complications. Due to significant outcome differences between intensive and conventional treatment groups, the DCCT trial was stopped early. At the closeout visit, patients were administratively censored and had a mean follow-up time of 6.5 years (range 3 to 9), 99% had completed the study, and more than 95% of all scheduled examinations were completed (The Diabetes Control and Complications Trial Research Group 1993). DCCT participants continued to be followed for disease progression after the trial in a long-term epidemiologic cohort study and were genotyped for GWAS in the DCCT Genetics Study.

Genome-wide genotyping in DCCT subjects was performed subsequently using Illumina 1M and HumanCoreExome Bead Arrays (Illumina, San Diego, CA, USA) and standard quality controls procedures were applied to individuals and genetic markers (Paterson et al. 2010; Roshandel et al. 2018). In this study, we use individuals genotyped with the HumanCoreExome Bead Array and ungenotyped autosomal SNPs imputed using 1000 Genomes (The 1000 Genomes Project Consortium 2015) data phase 3 (v5) and minimac3 [(Das et al. 2016), v.1.0.13], as previously described (Roshandel et al. 2018).

Because the goal of intensive therapy was to reduce HbA1c into the non-diabetic range, which produced treatment differences in HbA1c values, we focus on  $N=667$  unrelated individuals of European descent ancestry from the Conventional treatment group. Longitudinal measurements for HbA1c and SBP were collected at up to 39 quarterly visits during DCCT, while DR and DN events were diagnosed at annual and semi-annual visits respectively. HbA1c and SBP were

recorded irrespective of the occurrence of any complication event(s). Although the DCCT implemented robust quality assurance procedures to minimize potential sources of error during and after data collection (Steffes et al. 2005; Lorenzi et al. 2015), HbA1c and SBP are subject to large within-subject variability.

**List of the participants of the DCCT/EDIC Research Group (as of January 1, 2021)**

*Study Chairpersons* – D.M. Nathan (chair), B. Zinman (vice-chair); *Past*: O. Crofford;  
*Deceased*: S. Genuth

*Editor, EDIC Publications* – D.M. Nathan

**Clinical Centers**

Case Western Reserve University – *Current*: R. Gubitosi-Klug, L. Mayer, J. Wood, D. Miller, A. Nayate, M. Novak, S. Pendegast, L. Singerman, D. Weiss, H. Zegarra; *Past*: E. Brown, P. Crawford, M. Palmert, P. Pugsley, J. Quin, S. Smith-Brewer; *Deceased*: W. Dahms, S. Genuth, J. McConnell

Weill Cornell Medical College – *Current*: N.S. Gregory, R. Hanna, R. Chan, S. Kiss, A. Orlin, M. Rubin; *Past*: S. Barron, B. Bosco, D. Brillon, S. Chang, A. Dwoskin, M. Heinemann, L. Jovanovic, M.E. Lackaye, T. Lee, B. Levy, V. Reppucci, M. Richardson; *Deceased*: R. Campbell

Henry Ford Health System – *Current*: A. Bhan, J.K. Jones, D. Kruger, P.A. Edwards, H. Remtema; *Past*: E. Angus, A. Galprin, M. McLellan, A. Thomas; *Deceased*: J.D. Carey, F. Whitehouse

International Diabetes Center – *Current*: R. Bergenstal, S. Dunnigan, M. Johnson, A. Carlson, ; *Past*: R. Birk, P. Callahan, G. Castle, R. Cuddihy, M. Franz, D. Freking, L. Gill, J. Gott, K. Gunyou, P. Hollander, D. Kendall, J. Laechelt, S. List, W. Mestrezat, J. Nelson, B. Olson, N. Rude, M. Spencer, L. Thomas; *Deceased*: D. Etzwiler, K. Morgan

Joslin Diabetes Center – *Current*: L.P. Aiello, E. Golden, P. Arrigg, R. Beaser, L. Bestourous, J. Cavallerano, R. Cavicchi, O. Ganda, O. Hamdy, T. Murtha, D. Schlossman, S. Shah, G. Sharuk, P. Silva, P. Silver, M. Stockman, J. Sun, E. Weimann; *Past*: V. Asuquo, A. Jacobson, R. Kirby, L. Rand, J. Rosenzweig, H. Wolpert

Massachusetts General Hospital – *Current*: D.M. Nathan, M.E. Larkin, M. Cayford, A. deManbey, L. Gurry, J. Heier, A. Joseph, F. Leandre, K. Martin, C. Shah, C. Stevens, N. Thangthaeng; *Past*: E. Anderson, H. Bode, S. Brink, M. Christofi, C. Cornish, D. Cros, S. Crowell, L. Delahanty, K. Folino, S. Fritz, C. Gauthier-Kelly, J. Godine, C. Haggan, K. Hansen, P. Lou, J. Lynch, C. McKittrick, D. Moore, D. Norman, M. Ong, E. Ryan, C. Taylor, D. Zimble

Mayo Clinic – *Current*: A. Vella, A. Zipse, A. Barkmeier; *Past*: B. French, M. Haymond, J. Mortenson, J. Pach, R. Rizza, L. Schmidt, W.F. Schwenk, F.J. Service, R. Woodwick, G. Ziegler; *Deceased*: R. Colligan, A. Lucas, B. Zimmerman

Medical University of South Carolina – *Current*: H. Karanchi, L. Spillers, J. Fernandes, K. Hermayer, S. Kwon, K. Lee, M. Lopes-Virella, T. Lyons, M. Nutaitis; *Past*: A. Blevins, M.

Bracey, S. Caulder, J. Colwell, S. Elsing, A. Farr, D. Lee, P. Lindsey, L. Luttrell, R. Mayfield, J. Parker, N. Patel, C. Pittman, J. Selby, J. Soule, M. Szpiech, T. Thompson, D. Wood, S. Yacoub-Wasef

Northwestern University – *Current*: A. Wallia, M. Hartmuller, S. Ajroud-Driss, P. Astelford, A. Degillio, M. Gill, L. Jampol, C. Johnson, L. Kaminski, N. Leloudes, A. Lyon, R. Mirza, D. Ryan, E. Simjanoski, Z. Strugula; *Past*: D. Adelman, S. Colson, M. Molitch, B. Schaefer

University of California, San Diego – *Current*: S. Mudaliar, G. Lorenzi, O. Kolterman, M. Goldbaum; *Past*: T. Clark, M. Giotto, I. Grant, K. Jones, R. Lyon, M. Prince, R. Reed, M. Swenson; *Deceased*: G. Friedenberg

University of Iowa – *Current*: W.I. Sivitz, B. Vittetoe, J. Kramer; *Past*: M. Bayless, C. Fountain, R. Hoffman, J. MacIndoe, N. Olson, H. Schrott, L. Snetselaar, T. Weingeist, R. Zeitler

University of Maryland – *Current*: R. Miller, S. Johnsonbaugh; *Past*: M. Carney, D. Counts, T. Donner, J. Gordon, M. Hebdon, R. Hemady, B. Jones, A. Kowarski, R. Liss, S. Mendley, D. Ostrowski, M. Patronas, P. Salemi, S. Steidl

University of Michigan – *Current*: W.H. Herman, R. Pop-Busui, C.L. Martin, P. Lee, J. W. Albers, E.L. Feldman; *Past*: N. Burkhart, D.A. Greene, T. Sandford, M.J. Stevens; *Deceased*: J. Floyd

University of Minnesota – *Current*: J. Bantle, M. Rhodes, D. Koozekanani, S. Montezuma, J. Terry; *Past*: N. Flaherty, F. Goetz, C. Kwong, L. McKenzie, M. Mech, J. Olson, B. Rogness, T. Strand, R. Warhol, N. Wimmergren

University of Missouri – *Current*: D. Goldstein, D. Hainsworth, S. Hitt; *Deceased*: J. Giangiacomo

University of New Mexico – *Current*: D.S. Schade, J.L. Canady, R.B. Avery, M.R. Burge, J.E. Chapin, A. Das, L.H. Ketai; *Past*: D. Hornbeck, C. Johannes, J. Rich, M.L Schluter

University of Pennsylvania – *Current*: M. Schutta, P.A. Bourne, A. Brucker; *Past*: S. Braunstein, B.J. Maschak-Carey, S. Schwartz; *Deceased*: L. Baker

University of Pittsburgh – *Current*: T. Orchard, L. Cimino, D. Rubinstein; *Past*: D. Becker, B. Doft, D. Finegold, K. Kelly, L. Lobes, N. Silvers, T. Songer, D. Steinberg, L. Steranchak, J. Wesche; *Deceased*: A. Drash

University of South Florida – *Current*: J.I. Malone, A. Morrison, M.L. Bernal, P.R. Pavan; *Past*: L. Babbione, T.J. DeClue, N. Grove, D. McMillan, H. Solc, E.A. Tanaka, J. Vaccaro-Kish

University of Tennessee – *Current*: S. Dagogo-Jack, C. Wigley, S. Huddleston, A. Patel; *Past*: M. Bryer-Ash, E. Chaum, A. Iannacone, H. Lambeth, D. Meyer, S. Moser, M.B. Murphy, H. Ricks, S. Schussler, S. Yoser; *Deceased*: A. Kitabchi

University of Texas – *Current*: P. Raskin, S. Strowig, YG. He, E. Mendelson, RL. Ufret-Vincenty; *Past*: M. Basco; *Deceased*: S. Cercone

University of Toronto – *Current*: B.A. Perkins, B. Zinman, A. Barnie, N. Bakshi, M. Brent, R. Devenyi, K. Koushan, M. Mandelcorn, F. Perdikaris, L. Tuason; *Past*: D. Daneman, R. Ehrlich, S. Ferguson, A. Gordon, K. Perlman, S. Rogers

University of Washington – *Current*: I. Hirsch, R. Fahlstrom, L. Van Ottingham, I.H. de Boer, L. Olmos de Koo; *Past*: S. Catton, J. Ginsberg, J. Kinyoun, J. Palmer

University of Western Ontario – *Current*: C. McDonald, M. Driscoll, J. Bylsma, T. Sheidow; *Past*: W. Brown, C. Canny, P. Colby, S. Debrabandere, J. Dupre, J. Harth, I. Hramiak, M. Jenner, J. Mahon, D. Nicolle, N.W. Rodger, T. Smith

Vanderbilt University – *Current*: M. May, J. Lipps Hagan, T. Adkins, A. Agarwal, C. Lovell; *Past*: S. Feman, R. Lorenz, R. Ramker; *Deceased*: L. Survant

Washington University, St. Louis – *Current*: N.H. White, L. Levandoski; *Deceased*: I. Boniuk, J. Santiago

Yale University – *Current*: W. Tamborlane, P. Gatcomb, K. Stoessel; *Past*: J. Ahern, K. Fong, P. Ossorio, P. Ramos

Albert Einstein – *Past*: J. Brown-Friday, J. Crandall, H. Engel, S. Engel, H. Martinez, M. Phillips, M. Reid, H. Shamoon, J. Sheindlin

### **Clinical Coordinating Center**

Case Western Reserve University – *Current*: R. Gubitosi-Klug, L. Mayer, C. Beck, K. Farrell, P. Gaston; *Past*: S. Genuth, M. Palmert, J. Quin, R. Trail; *Deceased*: W. Dahms

### **Data Coordinating Center**

George Washington University, The Biostatistics Center – J. Lachin, I. Bebu, B. Braffett, J. Backlund, L. Diminick, L. El ghormli, X. Gao, D. Kenny, K. Klumpp, M. Lin, V. Trapani; *Past*: K. Anderson, K. Chan, P. Cleary, A. Determan, L. Dews, W. Hsu, P. McGee, H. Pan, B. Petty, D. Rosenberg, B. Rutledge, W. Sun, S. Villavicencio, N. Younes; *Deceased*: C. Williams

### **National Institute of Diabetes and Digestive and Kidney Disease**

National Institute of Diabetes and Digestive and Kidney Disease Program Office – E. Leschek; *Past*: C. Cowie, C. Siebert

### **EDIC Core Central Units**

Central Biochemistry Laboratory (University of Minnesota) – M. Steffes, A. Karger, J. Seegmiller, V. Arends; *Past*: J. Bucksa, B. Chavers, A. Killeen, M. Nowicki, A. Saenger

Central ECG Reading Unit (Wake Forest School of Medicine) – Y. Pokharel, M. Barr, C. Campbell, S. Hensley, J. Hu, L. Keasler, Y. Li, T. Taylor, Z.M. Zhang; *Past*: R. Prineas, E.Z. Soliman

Central Ophthalmologic Reading Unit (University of Wisconsin) – B. Blodi, R. Danis, D. Lawrence, H. Wabers; *Past*: M. Burger, M. Davis, J. Dingleline, V. Gama, S. Gangaputra, L. Hubbard, S. Neill, R. Sussman

Central Neuropsychological Reading Unit (NYU Winthrop Hospital, University of Pittsburgh) – A. Jacobson, C. Ryan, D. Saporito; *Past*: B. Burzuk, E. Cupelli, M. Geckle, D. Sandstrom, F. Thoma, T. Williams, T. Woodfill

**Cited literature**

Das S, Forer L, Schönherr S, Sidore C, Locke AE, Kwong A, Vrieze SI, Chew EY, Levy S, McGue M, et al. 2016. Next-generation genotype imputation service and methods. *Nat Genet.* 48(10):1284–1287. doi:10.1038/ng.3656. <http://www.ncbi.nlm.nih.gov/pubmed/27571263>.

Lorenzi GM, Braffett BH, Arends VL, Danis RP, Diminick L, Klumpp KA, Morrison AD, Soliman EZ, Steffes MW, Cleary PA, et al. 2015. Quality control measures over 30 years in a multicenter clinical study: Results from the Diabetes Control and Complications Trial / Epidemiology of Diabetes Interventions and Complications (DCCT/EDIC) study. *PLoS One.* 10(11):e0141286. doi:10.1371/journal.pone.0141286. <http://www.ncbi.nlm.nih.gov/pubmed/26529311>.

Paterson AD, Waggott D, Boright AP, Hosseini SM, Shen E, Sylvestre MP, Wong I, Bharaj B, Cleary PA, Lachin JM, et al. 2010. A genome-wide association study identifies a novel major locus for glycemic control in type 1 diabetes, as measured by both A1C and glucose. *Diabetes.* 59(2):539–549. doi:10.2337/db09-0653.

Roshandel D, Gubitosi-Klug R, Bull SB, Canty AJ, Pezzolesi MG, King GL, Keenan HA, Snell-Bergeon JK, Maahs DM, Klein R, et al. 2018. Meta-genome-wide association studies identify a locus on chromosome 1 and multiple variants in the MHC region for serum C-peptide in type 1 diabetes. *Diabetologia.* 61(5):1098–1111. doi:10.1007/s00125-018-4555-9. <http://www.ncbi.nlm.nih.gov/pubmed/29404672>.

Steffes M, Cleary P, Goldstein D, Little R, Wiedmeyer H-MM, Rohlfing C, England J, Bucksa J, Nowicki M. 2005. Hemoglobin A1c measurements over nearly two decades: sustaining comparable values throughout the Diabetes Control and Complications Trial and the Epidemiology of Diabetes Interventions and Complications study. *Clin Chem.* 51(4):753–8. doi:10.1373/clinchem.2004.042143. <http://www.ncbi.nlm.nih.gov/pubmed/15684277>.

The 1000 Genomes Project Consortium. 2015. A global reference for human genetic variation. *Nature.* 526(7571):68–74. doi:10.1038/nature15393. <http://www.ncbi.nlm.nih.gov/pubmed/26432245>.



The Diabetes Control and Complications Trial Research Group. 1993. The effect of intensive treatment of diabetes on the development and progression of long-term complications in insulin-dependent diabetes mellitus. *N Engl J Med.* 329(14):977–986.

doi:10.1056/NEJM199309303291401. [accessed 2019 Aug 15]. [www.nejm.org](http://www.nejm.org).
