# Supplementary material
Source: publisher figshare collection journal article supplement (https://gsajournals.figshare.com/articles/dataset/_/23315162)
Supplement: Supplementary file 1 [file 1]

## Sheet: Table S1-1
File S4. List of 307 candidate SNPs and their marginal association results with the discovery trait and with the other investigated traits in N=516 DCCT individuals
This table shows the candidate SNPs from the literature and their association results with the discovery trait (and other investigated traits) in the abalyzed DCCT individuals using separate analysis of each trait.
For each SNP, we fitted a longitudinal model for each HbA1c and SBP separately, and a time-to-event model for each T1DC trait separately ignoring both longitudinal QTs. All models included the same covariates as used in the joint model applied in DCCT. P-values are from 1 df Wald test for each SNP effect.
Only rs10810632 and rs1358030 reach the multiple testing correcting threshold of P*=1.7x10-4 with their discovery traits in this DCCT dataset.
SNP association results for those SNPs obtained from the joint models are shown in File S3 (section 4)
SNPs were annotated to protein coding genes using Ensembl Variant Effect Predictor with Ensembl/GENCODE transcripts and Assembly: GRCh38.p13 and using default options.
Lists of candidate SNPs from the literature by Discovery trait						Genotyped in DCCT	Imputation quality score (Rsq)	Risk allele	Effect allele	Effect allele frequency	HbA1c (l=1)		SBP (l=2)		Time-to-DR (k=1)		Time-to-DN (k=2)
Discovery trait (other T1DC associated traits)	Reference	RS_id	Chr:Pos	Gene symbol	Consequence							P		P		P		P
HbA1c	Wheeler et al, 2017	rs12621844	2:48187596	-	-	No	0.94401	T	C	0.381694	-0.00402678	0.957542	0.243253	0.600047	-0.034586	0.690572	0.0376321	0.845924
HbA1c	Paterson et al, 2010	rs286405	5:35577155	-	-	No	0.98083	C	T	0.44299	0.238609	0.00107846	0.26665	0.553292	0.127941	0.128198	0.123564	0.493741
HbA1c	Wheeler et al, 2017	rs1800562	6:26092913	HFE	missense_variant	Yes	0.99565	G	A	0.0542628	-0.379512	0.0195883	0.554366	0.579324	0.0390172	0.840536	-0.470003	0.360296
HbA1c	Paré et al, 2008	rs13266634	8:117172544	SLC30A8	missense_variant	Yes	0.99983	C	T	0.323145	0.214086	0.00570199	1.07813	0.0234276	-0.00328627	0.971155	0.209744	0.26473
HbA1c (DR, DN)	Paterson et al, 2010	rs10810632	9:16789026	BNC2	intron_variant	No	0.85203	T	C	0.07	0.928839	2.23486e-09	-1.46393	0.130385	0.696014	4.03398e-05	0.845145	0.0106137
HbA1c (DR, DN)	Paterson et al, 2010	rs1358030	10:106363841	-	-	No	0.93615	A	G	0.363145	0.433244	2.24761e-08	0.143695	0.765851	0.0890981	0.329522	-0.0213696	0.91522
HbA1c	Paterson et al, 2010	rs11624318	14:94839675	-	-	No	0.86711	C	A	0.185096	-0.213493	0.0328467	0.113286	0.85379	-0.15502	0.170377	-0.126993	0.619695
HbA1c	Paterson et al, 2010	rs11160219	14:94869154	-	-	Yes	0.99875	G	A	0.225534	-0.196787	0.0214957	-0.0773637	0.883133	-0.157235	0.109277	0.21799	0.272354
HbA1c	Paterson et al, 2010	rs690271	15:53212475	-	-	No	0.97158	G	A	0.112824	0.00632316	0.957173	0.704838	0.328798	0.101539	0.469965	0.223137	0.405216
HbA1c	Paterson et al, 2010	rs163061	18:26893778	-	-	No	0.80281	C	G	0.273037	0.357113	0.000244064	0.965067	0.107772	0.335943	0.00256933	0.29534	0.210845
SBP	Evangelou et al, 2018	rs260508	1:2255646	SKI	intron_variant	No	0.94438	T	G	0.383805	0.0344408	0.658176	0.170827	0.72045	0.140674	0.117796	0.000661222	0.997246
SBP	Evangelou et al, 2018	rs880315	1:10736809	CASZ1	intron_variant	Yes	0.99964	T	C	0.351832	0.00189333	0.981498	-0.0756251	0.879989	-0.0641256	0.501483	0.195416	0.339448
SBP	Evangelou et al, 2018	rs4846049	1:11790308	MTHFR	3_prime_UTR_variant	No	0.96696	G	T	0.307435	0.067489	0.411036	-0.683006	0.174701	0.0424926	0.6403	0.299351	0.130284
SBP	Evangelou et al, 2018	rs17367504	1:11802721	MTHFR	intron_variant	Yes	1.00008	A	G	0.154629	0.0172274	0.867578	-2.12498	0.000745536	-0.0246759	0.822827	-0.0030612	0.990527
SBP	Evangelou et al, 2018	rs5068	1:11845917	NPPA	3_prime_UTR_variant	No	0.92513	A	G	0.0524621	-0.0665142	0.704382	-1.28385	0.232025	0.0113448	0.952927	0.0109551	0.981854
SBP	Evangelou et al, 2018	rs3820068	1:15471702	CELA2A	intron_variant	No	0.95016	A	G	0.194916	-0.0353242	0.706739	-1.06089	0.0652718	-0.00398914	0.971144	0.216466	0.346366
SBP	Evangelou et al, 2018	rs2807337	1:22250878	-	-	No	0.99745	C	T	0.39494	0.0644766	0.378315	1.18358	0.00817562	-0.046019	0.584027	0.0317368	0.859041
SBP	Evangelou et al, 2018	rs3737801	1:27634321	FGR	intron_variant	No	0.60596	C	G	0.0870165	-0.0459992	0.787024	1.30108	0.212392	0.174437	0.363157	0.226463	0.543609
SBP	Evangelou et al, 2018	rs11210029	1:41399621	-	-	No	0.98715	A	G	0.36546	-0.0230465	0.776747	0.807278	0.104914	-0.0871667	0.363605	0.286969	0.150917
SBP	Evangelou et al, 2018	rs7515635	1:41942399	-	-	No	0.91831	C	T	0.467416	-0.0940755	0.228278	0.707206	0.139576	0.0452743	0.615192	-0.0217824	0.90975
SBP	Evangelou et al, 2018	rs839755	1:43390739	SZT2	intron_variant	No	0.99476	A	C	0.390858	0.0201489	0.793922	-0.322871	0.494916	-0.0156875	0.858344	0.185796	0.328448
SBP	Evangelou et al, 2018	rs11579440	1:48586751	AGBL4	intron_variant	No	0.82149	T	C	0.152916	0.0308351	0.792144	1.10926	0.121674	0.0714262	0.581168	0.138388	0.630193
SBP	Evangelou et al, 2018	rs10923038	1:88186088	-	-	No	0.89494	A	C	0.381897	-0.0693385	0.382064	0.270206	0.578689	-0.183911	0.0383686	-0.0129658	0.947956
SBP	Evangelou et al, 2018	rs10922502	1:88894475	GTF2B	upstream_gene_variant	No	0.99672	A	G	0.372405	0.0589729	0.430111	0.664188	0.147098	0.0734384	0.409733	0.130268	0.479926
SBP	Evangelou et al, 2018	rs7514579	1:93585793	BCAR3	intron_variant	No	0.967	A	C	0.219407	-0.0577697	0.510354	0.277596	0.606165	-0.0713095	0.446552	-0.242528	0.278319
SBP	Evangelou et al, 2018	rs17396055	1:94265398	-	-	No	0.9779	G	A	0.346356	0.120803	0.11826	-0.731054	0.123246	0.0266085	0.756583	-0.0497405	0.799344
SBP	Evangelou et al, 2018	rs76719272	1:156160005	SEMA4A	intron_variant	No	0.79764	C	T	0.114376	-0.0485651	0.708866	-0.187262	0.814438	-0.00601563	0.967462	-0.374129	0.29811
SBP	Evangelou et al, 2018	rs1043069	1:180890232	XPR1	3_prime_UTR_variant	No	0.83996	T	G	0.361056	-0.0804112	0.326391	-0.498538	0.321265	-0.00210903	0.981807	-0.210301	0.326679
SBP	Evangelou et al, 2018	rs4651224	1:184616048	C1orf21	intron_variant	No	0.90917	C	T	0.429649	0.0399295	0.618226	-0.0770315	0.875441	-0.00236704	0.979807	0.121756	0.543631
SBP	Evangelou et al, 2018	rs12042924	1:197328287	CRB1	intron_variant	No	0.87272	T	C	0.470092	0.0961042	0.239621	-0.445383	0.37424	-0.00171819	0.985375	-0.12169	0.545832
SBP	Evangelou et al, 2018	rs33996239	1:203140673	ADORA1	intron_variant	No	0.63221	C	T	0.0532991	-0.121537	0.556065	-0.340234	0.788153	0.156755	0.491257	0.578271	0.186573
SBP	Evangelou et al, 2018	rs7555285	1:209797010	IRF6	intron_variant	No	0.99325	C	G	0.216656	-0.0361099	0.692096	0.25274	0.651593	-0.112763	0.27007	-0.202765	0.401132
SBP	Evangelou et al, 2018	rs67720684	2:18794173	-	-	No	0.98245	C	A	0.247427	0.058326	0.505882	-1.06514	0.0471967	0.0765064	0.455669	0.115349	0.591531
SBP	Evangelou et al, 2018	rs1344653	2:19531084	-	-	No	0.99731	G	A	0.48399	0.00588977	0.937048	0.0436835	0.923907	-0.0443312	0.595473	-0.0658058	0.719636
SBP	Evangelou et al, 2018	rs55701159	2:24916727	ADCY3	intron_variant	No	0.89104	T	G	0.0982388	-0.278799	0.034325	0.200692	0.804207	0.25086	0.0767124	-0.241475	0.504478
SBP	Evangelou et al, 2018	rs1275988	2:26691496	KCNK3	protein_coding	No	0.97742	T	C	0.412212	0.0534101	0.482707	1.25452	0.00699402	0.0809937	0.350554	0.157304	0.399655
SBP	Evangelou et al, 2018	rs9678851	2:27664167	SLC4A1AP	missense_variant	Yes	0.99965	A	C	0.45301	0.00138027	0.985293	0.495351	0.280523	0.0246548	0.765654	-0.20334	0.287689
SBP	Evangelou et al, 2018	rs7562	2:28412873	FOSL2	3_prime_UTR_variant	No	0.95679	T	C	0.480158	-0.0175878	0.816062	-0.540262	0.243706	-0.0284885	0.742607	0.210494	0.260911
SBP	Evangelou et al, 2018	rs13420463	2:37290423	PRKD3	intron_variant	No	0.9801	A	G	0.227741	-0.187233	0.0368692	-0.619055	0.261057	-0.161188	0.129743	0.069675	0.762394
SBP	Evangelou et al, 2018	rs35590893	2:43489794	THADA	intron_variant	No	0.95715	G	A	0.280904	0.0178639	0.832829	-0.545264	0.293106	0.00520373	0.956328	0.328247	0.0998823
SBP	Evangelou et al, 2018	rs6545155	2:50202723	NRXN1	intron_variant	No	0.99373	T	C	0.224528	-0.0218002	0.814089	-0.259178	0.64844	-0.0163929	0.87419	-0.0166075	0.940768
SBP	Evangelou et al, 2018	rs10189186	2:52798619	-	-	No	0.9856	A	G	0.483805	-0.048531	0.495858	-0.374376	0.391704	-0.0312758	0.694987	-0.00639822	0.970883
SBP	Evangelou et al, 2018	rs2920899	2:55052545	RTN4	intron_variant	No	0.95156	T	G	0.1682	0.114982	0.254968	-0.264778	0.669166	-0.0754856	0.522157	-0.0445267	0.859613
SBP	Evangelou et al, 2018	rs72816333	2:59869425	-	-	No	0.94905	A	T	0.159811	0.0848424	0.399773	1.09026	0.0773398	0.0736287	0.514164	0.0850672	0.733006
SBP	Evangelou et al, 2018	rs2300481	2:66555335	MEIS1	intron_variant	No	0.94313	C	T	0.38259	0.054652	0.499106	-0.55742	0.260945	-0.0707074	0.442653	0.121178	0.534313
SBP	Evangelou et al, 2018	rs72847885	2:86099594	POLR1A	intron_variant	No	0.92834	A	G	0.314609	0.0236617	0.772313	-0.271273	0.588533	0.106463	0.261363	0.0578783	0.777846
SBP	Evangelou et al, 2018	rs28377357	2:112012144	MERTK	intron_variant	No	0.98697	G	A	0.275331	-0.021229	0.794402	0.743296	0.136378	0.0759521	0.400871	0.205228	0.263679
SBP	Evangelou et al, 2018	rs6723509	2:121243169	TFCP2L1	intron_variant	No	0.96194	T	C	0.14942	-0.0848768	0.414408	0.164041	0.79707	-0.12671	0.283898	-0.0164157	0.946052
SBP	Evangelou et al, 2018	rs72844590	2:137663657	THSD7B	intron_variant	No	0.9603	G	T	0.14291	-0.13978	0.182979	0.168999	0.79307	-0.145075	0.23964	0.113834	0.650447
SBP	Evangelou et al, 2018	rs79523138	2:160511702	-	-	No	0.89883	A	G	0.0977484	0.210931	0.0998716	0.166953	0.832139	0.0765481	0.595701	0.238213	0.429583
SBP	Evangelou et al, 2018	rs55732192	2:161421722	TBR1	intron_variant	No	0.92849	G	T	0.087678	-0.118863	0.384724	-0.967885	0.248408	-0.218956	0.179261	-0.536501	0.208333
SBP	Evangelou et al, 2018	rs1446468	2:164106976	-	-	Yes	0.99993	C	T	0.465159	-0.00110522	0.98859	-0.141807	0.764781	-0.0283104	0.749681	0.298959	0.128553
SBP	Evangelou et al, 2018	rs6712094	2:164186950	-	-	No	0.98429	A	G	0.291985	0.000687488	0.993281	-0.529715	0.289842	-0.000163592	0.998568	0.116152	0.554251
SBP	Evangelou et al, 2018	rs6712203	2:164700808	COBLL1	intron_variant	No	0.94297	C	T	0.355177	0.0367335	0.650013	-0.866844	0.080447	-0.130185	0.151747	-0.145803	0.478669
SBP	Evangelou et al, 2018	rs11694601	2:174084630	OLA1	intron_variant	No	0.95886	A	G	0.404691	0.142162	0.0658662	0.0790367	0.867781	0.163021	0.0630782	0.0257568	0.894934
SBP	Evangelou et al, 2018	rs1837164	2:177851874	PDE11A	intron_variant	No	0.99417	T	A	0.378197	0.0555033	0.458752	-0.00340538	0.994088	-0.229838	0.0115319	-0.0907251	0.62357
SBP	Evangelou et al, 2018	rs6739913	2:184168338	-	-	No	0.99607	A	G	0.285061	0.0489777	0.567378	-0.472308	0.368344	-0.00709696	0.942291	-0.0870051	0.686069
SBP	Evangelou et al, 2018	rs28558491	2:186951594	-	-	No	0.96881	T	C	0.255503	0.00273006	0.974808	-0.116747	0.825711	-0.127223	0.203602	0.370111	0.0766377
SBP	Evangelou et al, 2018	rs6434404	2:190629685	-	-	No	0.85454	G	A	0.326868	0.00187321	0.98236	1.34488	0.00943492	0.0154088	0.872071	0.413733	0.0382417
SBP	Evangelou et al, 2018	rs296797	2:200238182	-	-	Yes	0.99963	C	T	0.381625	-0.036973	0.636784	-0.30389	0.526853	0.113489	0.18662	-0.215492	0.28858
SBP	Evangelou et al, 2018	rs1047891	2:210675783	CPS1	missense_variant	No	0.83213	C	A	0.299743	-0.02168	0.802706	0.182954	0.730947	-0.0647956	0.512055	0.518591	0.0114357
SBP	Evangelou et al, 2018	rs12694277	2:212324070	ERBB4	intron_variant	No	0.94141	C	T	0.284554	-0.0992547	0.232966	-0.0300056	0.95315	-0.0931605	0.310779	0.231104	0.246324
SBP	Evangelou et al, 2018	rs2972146	2:226235982	-	-	Yes	1.0002	T	G	0.369075	0.00238461	0.973804	-0.271405	0.542241	0.132421	0.102834	-0.00504223	0.977454
SBP	Evangelou et al, 2018	rs1044822	2:229764422	TRIP12	3_prime_UTR_variant	No	0.94656	C	T	0.136435	-0.0402539	0.702146	-0.38454	0.551311	0.0052552	0.9677	0.153195	0.557354
SBP	Evangelou et al, 2018	rs347591	3:11248436	HRH1	intron_variant	No	0.98594	T	G	0.366472	0.0372777	0.625904	0.356712	0.446751	-0.0171934	0.852447	0.356159	0.0623099
SBP	Evangelou et al, 2018	rs11128722	3:14916619	FGD5	intron_variant	No	0.78646	A	G	0.452388	0.0846659	0.31311	-0.0489712	0.924237	0.0786798	0.407969	0.0500861	0.812334
SBP	Evangelou et al, 2018	rs12638085	3:30364444	-	-	No	0.98307	T	A	0.362234	0.0297753	0.698186	0.338289	0.472624	-0.0190848	0.82527	0.0661129	0.727792
SBP	Evangelou et al, 2018	rs6788984	3:41065682	-	-	No	0.89631	A	G	0.142401	0.0767494	0.497655	0.0956396	0.890403	0.166409	0.185506	-0.40621	0.206153
SBP	Evangelou et al, 2018	rs6774721	3:49344465	USP4	protein_coding	No	0.93569	G	A	0.143168	-0.198439	0.0723527	-0.332066	0.624527	-0.0377433	0.767905	0.101516	0.703579
SBP	Evangelou et al, 2018	rs4499560	3:70871334	-	-	No	0.99011	T	A	0.346098	-0.0125766	0.872023	0.794581	0.0966773	0.0850612	0.314896	0.0809884	0.666839
SBP	Evangelou et al, 2018	rs1375564	3:85607161	CADM2	intron_variant	No	0.99311	T	C	0.359646	-0.0361808	0.633699	-0.222229	0.633117	0.0402199	0.636911	0.067588	0.720155
SBP	Evangelou et al, 2018	rs1882289	3:114742361	ZBTB20	intron_variant	Yes	0.99885	A	G	0.133188	0.0239181	0.828124	-0.910782	0.177349	0.12836	0.287973	-0.314219	0.302303
SBP	Evangelou et al, 2018	rs6438857	3:124838796	ITGB5	intron_variant	No	0.91249	T	C	0.428775	0.0643126	0.39948	0.338881	0.469142	-0.0615072	0.484703	-0.0012195	0.99489
SBP	Evangelou et al, 2018	rs9875380	3:133061512	TMEM108	intron_variant	No	0.98477	C	T	0.463657	-0.00942361	0.897913	-0.477208	0.289215	0.0153426	0.853804	0.00722923	0.968475
SBP	Evangelou et al, 2018	rs863930	3:136230895	-	-	No	0.99615	G	T	0.458441	-0.0977253	0.182122	0.012559	0.977726	0.0295182	0.722164	0.198591	0.276108
SBP	Evangelou et al, 2018	rs143112823	3:154990178	-	-	No	0.69873	G	A	0.0688673	-0.0623856	0.713047	1.693	0.103215	0.0448284	0.827054	0.0434048	0.916969
SBP	Evangelou et al, 2018	rs78151625	3:158598937	MLF1	intron_variant	No	0.99503	T	C	0.1638	-0.0346579	0.729446	-0.386826	0.529025	-0.0541784	0.63551	0.0682367	0.775245
SBP	Evangelou et al, 2018	rs262986	3:183717925	YEATS2	intron_variant	No	0.92483	A	G	0.49543	0.160036	0.04405	-0.375944	0.441507	-0.0595398	0.520256	0.122424	0.555175
SBP	Evangelou et al, 2018	rs231708	4:2693046	FAM193A	intron_variant	No	0.96653	C	G	0.294384	-0.00162398	0.983963	-0.526237	0.288159	0.0261073	0.773402	-0.133031	0.523861
SBP	Evangelou et al, 2018	rs2610990	4:18006609	LCORL	intron_variant	No	0.92878	G	A	0.271159	0.0283841	0.744308	-0.144721	0.786303	-0.0485563	0.610577	-0.255326	0.25667
SBP	Evangelou et al, 2018	rs2291435	4:38385774	-	-	No	0.90368	T	C	0.473169	-0.008943	0.906664	-0.0942942	0.84025	0.0316534	0.718046	-0.227092	0.231725
SBP	Evangelou et al, 2018	rs12511987	4:46593606	-	-	No	0.90139	T	G	0.186237	-0.130374	0.192126	0.122824	0.84131	0.00850629	0.938629	0.0457987	0.849236
SBP	Evangelou et al, 2018	rs10008637	4:76492991	SHROOM3	intron_variant	No	0.98222	T	C	0.4644	0.0363087	0.621131	0.175711	0.696491	0.00323165	0.97001	0.0422069	0.817275
SBP	Evangelou et al, 2018	rs2014912	4:85794517	ARHGAP24	intron_variant	No	0.86599	C	T	0.152131	0.105151	0.350102	-0.703446	0.308161	0.215631	0.0793604	0.100701	0.714053
SBP	Evangelou et al, 2018	rs13149209	4:88829517	FAM13A	intron_variant	No	0.95606	T	C	0.206556	-0.140275	0.134383	0.324627	0.572537	0.00205502	0.984922	0.659875	0.00169249
SBP	Evangelou et al, 2018	rs1347345	4:95017235	BMPR1B	intron_variant	No	0.99497	A	G	0.398249	0.0613523	0.42524	-0.151671	0.747941	-0.0341938	0.694896	-0.0920723	0.625099
SBP	Evangelou et al, 2018	rs13112725	4:105990585	NPNT	intron_variant	No	0.85238	C	G	0.257232	0.0230317	0.80364	0.0465716	0.934657	0.143986	0.161158	0.423816	0.0466279
SBP	Evangelou et al, 2018	rs3097937	4:123873489	-	-	No	0.99866	A	T	0.180828	-0.00501135	0.957399	-0.64844	0.259425	0.0781494	0.478698	0.333051	0.120087
SBP	Evangelou et al, 2018	rs7439567	4:137543688	-	-	No	0.94289	C	T	0.390669	-0.0730418	0.339675	0.447189	0.340399	0.0785367	0.361334	0.133706	0.474112
SBP	Evangelou et al, 2018	rs72719160	4:143130123	-	-	No	0.97959	A	T	0.312695	0.10257	0.210012	0.844231	0.0925837	-0.0203421	0.823319	-0.128392	0.538753
SBP	Evangelou et al, 2018	rs6823767	4:150373933	LRBA	intron_variant	No	0.9442	T	C	0.266282	0.0315078	0.701584	0.30031	0.551423	-0.0705966	0.437765	0.0717523	0.717913
SBP	Evangelou et al, 2018	rs17035181	4:156757359	PDGFC	downstream_gene_variant	No	0.97702	T	G	0.143719	0.133047	0.235911	-0.502465	0.46587	-0.0605677	0.641637	-0.245184	0.416881
SBP	Evangelou et al, 2018	rs4957026	5:361033	AHRR	intron_variant	No	0.98787	G	A	0.337366	-0.0448675	0.572017	1.27869	0.00842578	-0.0241622	0.776893	0.230733	0.226676
SBP	Evangelou et al, 2018	rs10069690	5:1279675	TERT	intron_variant	Yes	0.99569	C	T	0.289701	0.14735	0.0653609	-0.432127	0.3787	-0.0317687	0.729355	0.102	0.612419
SBP	Evangelou et al, 2018	rs1421811	5:32714164	NPR3	intron_variant	No	0.91832	C	G	0.398645	0.0696983	0.377492	-0.766571	0.113291	-0.0767006	0.395902	-0.0950208	0.643331
SBP	Evangelou et al, 2018	rs1173771	5:32814922	-	-	Yes	0.99991	G	A	0.397988	-0.127856	0.078679	-0.281903	0.527905	-0.0446205	0.584212	-0.0306782	0.864898
SBP	Evangelou et al, 2018	rs74774746	5:33411663	-	-	No	0.94011	G	C	0.259626	-0.0810149	0.362874	0.808827	0.138323	0.0474774	0.647177	-0.29429	0.208368
SBP	Evangelou et al, 2018	rs1694068	5:53987800	ARL15	intron_variant	No	0.9813	A	T	0.373964	0.0781817	0.304261	-0.617211	0.185922	-0.00884829	0.921157	0.188319	0.32565
SBP	Evangelou et al, 2018	rs13179413	5:56572270	-	-	No	0.7182	C	T	0.273341	-0.0235147	0.806111	-0.065372	0.911399	-0.0482174	0.640541	0.0966577	0.671325
SBP	Evangelou et al, 2018	rs6875372	5:64783188	CWC27	intron_variant	No	0.8687	A	T	0.467116	0.0261011	0.736985	-0.200975	0.673519	0.120569	0.153404	0.143532	0.438715
SBP	Evangelou et al, 2018	rs3121685	5:66366305	-	-	No	0.9166	C	T	0.485496	0.128287	0.0979782	-0.714065	0.133355	-0.0197663	0.823928	-0.304532	0.114072
SBP	Evangelou et al, 2018	rs246973	5:68711976	-	-	No	0.90165	C	T	0.271855	-0.152699	0.0724391	0.0700946	0.893204	0.0883156	0.351243	0.2453	0.214159
SBP	Evangelou et al, 2018	rs10059921	5:88218698	TMEM161B	intron_variant	No	0.68043	G	T	0.0743277	0.0684728	0.686318	-1.10344	0.288272	-0.127088	0.504175	-0.202443	0.650807
SBP	Evangelou et al, 2018	rs709668	5:96838483	-	-	No	0.99292	G	A	0.180053	0.0410193	0.669895	0.190679	0.746603	0.169647	0.111801	-0.5593	0.055177
SBP	Evangelou et al, 2018	rs1871190	5:98618015	-	-	No	0.8287	G	T	0.3529	0.073749	0.374765	-0.195584	0.701178	-0.00203944	0.982794	0.0320055	0.873264
SBP	Evangelou et al, 2018	rs1008058	5:123099932	PRDM6	missense_variant	Yes	0.99202	G	A	0.115847	-0.00906938	0.938291	0.192449	0.78882	-0.141269	0.303666	-0.111675	0.720822
SBP	Evangelou et al, 2018	rs13359291	5:123140763	PRDM6	intron_variant	No	0.99461	G	A	0.151083	0.0465886	0.651072	0.634607	0.314881	-0.0849924	0.490575	0.106645	0.674461
SBP	Evangelou et al, 2018	rs62373688	5:128017115	-	-	No	0.92693	T	A	0.119653	0.113564	0.32693	0.446149	0.53002	0.00186374	0.988475	0.370563	0.154824
SBP	Evangelou et al, 2018	rs6595838	5:128532506	FBN2	intron_variant	No	0.98508	G	A	0.284936	0.0297131	0.724377	-0.201424	0.696687	-0.0331746	0.733868	0.152455	0.466282
SBP	Evangelou et al, 2018	rs702395	5:140707092	ZMAT2	downstream_gene_variant	No	0.99654	C	T	0.432474	0.0606917	0.427868	0.331623	0.47984	0.00322691	0.969657	0.0174592	0.924789
SBP	Evangelou et al, 2018	rs12153395	5:179984477	RNF130	intron_variant	No	0.90311	G	A	0.101089	0.217152	0.0871423	-0.870816	0.263752	-0.0040757	0.978313	0.114687	0.733799
SBP	Evangelou et al, 2018	rs2745599	6:1613451	FOXC1	3_prime_UTR_variant	Yes	0.99691	A	G	0.431183	-0.00234725	0.97493	0.443684	0.332553	0.0270177	0.744475	0.0844688	0.644805
SBP	Evangelou et al, 2018	rs9368222	6:20686765	CDKAL1	intron_variant	Yes	0.99998	C	A	0.286368	-0.0475786	0.532777	-0.494007	0.290817	0.0626186	0.456088	-0.205263	0.313483
SBP	Evangelou et al, 2018	rs6911827	6:22130372	-	-	No	0.98869	C	T	0.462454	-0.109114	0.141479	0.2175	0.633134	-0.121372	0.153788	-0.0250659	0.890762
SBP	Evangelou et al, 2018	rs10948071	6:43312975	CRIP3	upstream_gene_variant	No	0.99455	T	C	0.413157	-0.0127107	0.860909	0.0525564	0.905971	0.0342766	0.665973	0.116589	0.504134
SBP	Evangelou et al, 2018	rs1563788	6:43340625	ZNF318	intron_variant	No	0.9829	C	T	0.314227	-0.0933092	0.236015	-0.272334	0.573052	0.0846965	0.320749	0.12983	0.4854
SBP	Evangelou et al, 2018	rs78648104	6:50715296	TFAP2D	missense_variant	Yes	0.99985	T	C	0.0903889	-0.0522231	0.690887	-1.73055	0.0313894	0.127751	0.345869	-0.704986	0.0907391
SBP	Evangelou et al, 2018	rs9449350	6:81571700	TENT5A	intron_variant	No	0.98442	T	C	0.330135	0.025501	0.746307	0.200576	0.678158	0.130986	0.129049	0.219768	0.250837
SBP	Evangelou et al, 2018	rs35410524	6:96437529	-	-	No	0.95889	C	T	0.181542	0.178442	0.0683382	-0.661835	0.270808	0.0907234	0.417135	0.0479393	0.843756
SBP	Evangelou et al, 2018	rs2498586	6:117704963	NUS1	intron_variant	No	0.92582	C	T	0.191588	0.117196	0.213911	-0.116565	0.840387	0.0592316	0.562408	-0.261971	0.305407
SBP	Evangelou et al, 2018	rs9401090	6:118792154	-	-	Yes	1.00003	T	C	0.257937	0.0289456	0.72454	-0.318388	0.527313	-0.0851086	0.336491	-0.207747	0.321378
SBP	Evangelou et al, 2018	rs10782230	6:125907366	NCOA7	intron_variant	No	0.98628	A	G	0.484547	-0.0934263	0.2104	0.146691	0.748613	-0.19179	0.0230665	0.0571282	0.754445
SBP	Evangelou et al, 2018	rs9885632	6:130990769	EPB41L2	intron_variant	No	0.98561	T	C	0.251434	0.0955968	0.268238	-0.430492	0.416367	-0.0533116	0.595634	-0.0168079	0.937582
SBP	Evangelou et al, 2018	rs7763294	6:140062596	-	-	No	0.91185	G	T	0.29999	0.112906	0.17471	-0.57998	0.255825	0.0382346	0.68312	0.185093	0.368365
SBP	Evangelou et al, 2018	rs7765526	6:147392628	STXBP5	downstream_gene_variant	No	0.97301	G	A	0.472631	0.109041	0.14983	0.152065	0.743621	0.0537275	0.512432	0.17344	0.34845
SBP	Evangelou et al, 2018	rs6959688	7:1927195	MAD1L1	intron_variant	No	0.92479	A	G	0.423345	0.0295324	0.702432	0.164247	0.728979	0.0629397	0.47165	-0.258203	0.177724
SBP	Evangelou et al, 2018	rs12979	7:24698545	GSDME	3_prime_UTR_variant	No	0.95547	C	G	0.129558	-0.0850365	0.436203	-0.308748	0.644944	0.242276	0.0477536	-0.19846	0.515026
SBP	Evangelou et al, 2018	rs6969780	7:27119517	HOXA3	intron_variant	Yes	1.0002	G	C	0.0876121	-0.273915	0.0377851	-0.657539	0.417335	0.101222	0.49812	0.090372	0.782899
SBP	Evangelou et al, 2018	rs10274928	7:28102469	JAZF1	intron_variant	No	0.8075	G	A	0.478567	-0.025644	0.763197	0.0682645	0.895927	0.033644	0.72441	-0.152545	0.467199
SBP	Evangelou et al, 2018	rs10233127	7:30893838	-	intron_variant	No	0.74389	T	A	0.125744	-0.0713591	0.563252	-0.541599	0.474287	0.102004	0.49222	0.208377	0.482638
SBP	Evangelou et al, 2018	rs6593297	7:56054365	CCT6A	intron_variant	No	0.98716	T	A	0.293077	0.0539338	0.494016	-0.172461	0.721443	-0.0729517	0.418116	0.12659	0.512735
SBP	Evangelou et al, 2018	rs6963105	7:75468222	POM121C	intron_variant	No	0.50119	G	A	0.462593	-0.109772	0.274234	-0.999294	0.104439	-0.0279185	0.812941	-0.0550527	0.826825
SBP	Evangelou et al, 2018	rs848445	7:77943144	PHTF2	intron_variant	No	0.89849	C	T	0.286167	-0.148211	0.0813886	-0.695676	0.182468	-0.261089	0.00837244	-0.165628	0.444689
SBP	Evangelou et al, 2018	rs17477177	7:106771412	-	-	Yes	1.00021	T	C	0.166887	-0.0208467	0.833553	1.15584	0.0570757	-0.0804148	0.492612	0.0785188	0.74484
SBP	Evangelou et al, 2018	rs4728142	7:128933913	IRF5	upstream_gene_variant	Yes	0.99869	G	A	0.467581	-0.083924	0.251457	-0.0894271	0.842215	-0.0275003	0.7453	0.111938	0.531224
SBP	Evangelou et al, 2018	rs34072724	7:130747710	-	-	No	0.98758	G	A	0.496471	-0.0327025	0.663016	-0.284919	0.535831	0.0510491	0.539338	-0.0550184	0.75553
SBP	Evangelou et al, 2018	rs13238550	7:131374297	MKLN1	intron_variant	No	0.98568	G	A	0.390119	-0.0806127	0.272542	-0.519864	0.248512	-0.123861	0.138722	-0.192093	0.314674
SBP	Evangelou et al, 2018	rs12703989	7:140538248	DENND2A	intron_variant	No	0.67412	G	A	0.438495	-0.145174	0.103096	0.0658428	0.904145	0.0201953	0.836725	-0.103678	0.63596
SBP	Evangelou et al, 2018	rs11771693	7:150353022	-	-	No	0.95238	A	G	0.340021	0.212066	0.0065694	-0.472772	0.324925	0.088357	0.311327	-0.104037	0.594588
SBP	Evangelou et al, 2018	rs10224002	7:151717955	PRKAG2	intron_variant	Yes	0.99933	A	G	0.309165	-0.0292238	0.720527	0.300315	0.548811	0.141606	0.139839	-0.0583642	0.77973
SBP	Evangelou et al, 2018	rs1870735	7:155951609	-	-	No	0.8713	G	C	0.453167	-0.075957	0.321813	0.265933	0.571981	-0.0799518	0.363251	-0.291099	0.134174
SBP	Evangelou et al, 2018	rs4875958	8:1772924	CLN8	intron_variant	Yes	0.999	A	G	0.285027	0.0151252	0.85327	0.191085	0.703181	-0.0108868	0.904771	0.0781748	0.6852
SBP	Evangelou et al, 2018	rs61040371	8:8646190	-	-	No	0.97919	T	C	0.352363	-0.0169479	0.824342	-0.41458	0.375861	0.0171343	0.838456	-0.0811335	0.67955
SBP	Evangelou et al, 2018	rs62491354	8:9873153	-	-	No	0.9973	G	A	0.137355	-0.143626	0.166146	1.76846	0.00530633	-0.0157133	0.889587	0.268908	0.241112
SBP	Evangelou et al, 2018	rs1986971	8:10411226	MSRA	intron_variant	No	0.89838	A	G	0.296151	-0.0386304	0.652987	-0.117802	0.823069	-0.187725	0.0492866	-0.227959	0.294693
SBP	Evangelou et al, 2018	rs2898290	8:11576400	-	-	No	0.95187	C	T	0.459943	-0.048501	0.523858	-0.0563228	0.903932	-0.00514261	0.952738	-0.00490201	0.978872
SBP	Evangelou et al, 2018	rs4841569	8:11594668	-	-	No	0.92412	G	A	0.422558	0.059586	0.461001	-0.139783	0.77802	0.082544	0.381483	0.218392	0.265969
SBP	Evangelou et al, 2018	rs6557876	8:26043159	EBF2	intron_variant	No	0.9791	C	T	0.256035	0.0342232	0.689087	0.116944	0.823608	0.002762	0.976807	-0.259311	0.25335
SBP	Evangelou et al, 2018	rs2979470	8:30430756	RBPMS	intron_variant	No	0.97472	C	T	0.49456	-0.00564816	0.938391	-0.30211	0.500088	0.0669252	0.435262	-0.239661	0.203427
SBP	Evangelou et al, 2018	rs1906672	8:38272507	NSD3	3_prime_UTR_variant	No	0.97554	G	A	0.243551	-0.0674283	0.444935	-0.322322	0.551725	-0.157531	0.113763	-0.140013	0.537842
SBP	Evangelou et al, 2018	rs4873492	8:51034989	-	-	No	0.89424	C	T	0.18626	0.0138222	0.887679	-0.100856	0.866635	-0.0697781	0.545936	0.159584	0.511722
SBP	Evangelou et al, 2018	rs6996733	8:59623265	-	-	No	0.85419	T	C	0.166429	-0.0116507	0.911745	0.8524	0.185773	-0.00156027	0.989344	-0.145084	0.593132
SBP	Evangelou et al, 2018	rs2354862	8:63589186	-	-	No	0.99044	A	C	0.36305	-0.167966	0.0295448	0.68716	0.147067	0.0399047	0.637577	-0.142964	0.45648
SBP	Evangelou et al, 2018	rs13253358	8:68007900	PREX2	intron_variant	No	0.95678	C	T	0.307355	-0.0499936	0.541966	-0.635947	0.205802	-0.0644395	0.503834	0.146305	0.47282
SBP	Evangelou et al, 2018	rs72688070	8:80481462	ZBTB10	upstream_gene_variant	No	0.98241	C	T	0.198277	0.0697887	0.454119	-0.44443	0.437169	-0.118023	0.287735	-0.267016	0.286954
SBP	Evangelou et al, 2018	rs62526122	8:91757341	-	-	No	0.71795	G	A	0.24609	0.0427015	0.666015	-1.10123	0.0693225	0.102793	0.368598	0.0368846	0.880356
SBP	Evangelou et al, 2018	rs35783704	8:104954030	-	-	No	0.89062	G	A	0.102215	0.121495	0.360677	0.206664	0.800018	-0.024239	0.875066	-0.316555	0.38685
SBP	Evangelou et al, 2018	rs62523863	8:125508302	-	-	No	0.87557	G	A	0.234375	0.0267428	0.773569	-0.329722	0.562962	-0.0272294	0.802615	-0.00696292	0.976366
SBP	Evangelou et al, 2018	rs4598218	8:128471710	-	-	No	0.92739	T	C	0.386166	-0.0143866	0.857153	0.313225	0.522701	0.0116195	0.898754	-0.272105	0.181759
SBP	Evangelou et al, 2018	rs4129585	8:142231572	TSNARE1	intron_variant	No	0.90148	C	A	0.41945	0.052218	0.508669	1.26045	0.00911992	-0.102858	0.263798	-0.176535	0.393231
SBP	Evangelou et al, 2018	rs520015	9:211762	DOCK8	upstream_gene_variant	No	0.96268	C	G	0.480268	0.0367092	0.623833	-0.574826	0.210256	-0.0160135	0.854121	-0.0869903	0.639915
SBP	Evangelou et al, 2018	rs60191654	9:753648	-	-	No	0.94869	A	G	0.172054	-0.0562308	0.580219	-0.624675	0.316213	0.0263151	0.824638	-0.0625446	0.81311
SBP	Evangelou et al, 2018	rs28558845	9:4334791	-	-	No	0.79323	G	C	0.167222	0.0837909	0.451938	-0.169357	0.804211	-0.0398246	0.743583	0.239407	0.336672
SBP	Evangelou et al, 2018	rs1332813	9:9350706	PTPRD	intron_variant	No	0.98999	C	T	0.372782	0.0661277	0.392842	0.028239	0.952569	-0.110466	0.196299	0.115481	0.539379
SBP	Evangelou et al, 2018	rs9886665	9:22942771	-	-	No	0.8347	C	T	0.302217	0.0955129	0.278888	0.42852	0.428313	-0.0881992	0.380628	0.476708	0.0198439
SBP	Evangelou et al, 2018	rs7045409	9:92439258	CENPP	intron_variant	No	0.96963	T	A	0.364676	0.0873707	0.275495	-0.231652	0.637713	-0.0380743	0.666814	0.346365	0.0709085
SBP	Evangelou et al, 2018	rs7023828	9:125736315	-	-	No	0.95623	C	T	0.382634	0.0259888	0.736435	-0.518637	0.273073	-0.0874505	0.323611	0.0233828	0.9036
SBP	Evangelou et al, 2018	rs1891730	9:127546749	NIBAN2	intron_variant	No	0.92471	T	C	0.361526	0.0191862	0.810166	0.3465	0.479372	-0.049403	0.59739	-0.101634	0.614604
SBP	Evangelou et al, 2018	rs184457	9:129177740	IER5L	missense_variant	No	0.97964	G	A	0.340432	0.0790203	0.321825	-0.639889	0.190607	0.120991	0.170628	0.00270361	0.989
SBP	Evangelou et al, 2018	rs56352451	10:5762902	TASOR2	intron_variant	No	0.99766	C	T	0.117126	-0.113012	0.320326	-1.23751	0.0757378	0.156006	0.218141	-0.063251	0.829831
SBP	Evangelou et al, 2018	rs3802517	10:27944540	ODAD2	intron_variant	No	0.99136	T	A	0.479669	-0.0114975	0.877448	0.83076	0.068874	-0.0256791	0.752075	0.0524163	0.776806
SBP	Evangelou et al, 2018	rs34130368	10:47327566	GDF2	3_prime_UTR_variant	No	0.513	G	T	0.121353	0.135536	0.361938	-0.25946	0.776	-0.191625	0.272901	0.540222	0.108706
SBP	Evangelou et al, 2018	rs12572586	10:72991821	-	-	No	0.74732	T	C	0.0663388	-0.165119	0.34601	1.33388	0.214258	-0.0996974	0.635935	0.19048	0.64815
SBP	Evangelou et al, 2018	rs4746172	10:74096084	VCL	intron_variant	No	0.92786	T	C	0.272712	-6.83691e-05	0.999387	-0.114629	0.833575	-0.0286093	0.776718	-0.121809	0.57732
SBP	Evangelou et al, 2018	rs11187142	10:92708928	-	-	No	0.97394	C	T	0.112195	0.146576	0.220078	0.497077	0.498075	0.0255086	0.852718	-0.340925	0.309423
SBP	Evangelou et al, 2018	rs932764	10:94136183	PLCE1	intron_variant	Yes	1.00015	A	G	0.445904	-0.118613	0.102941	-0.290084	0.516148	0.0013949	0.986591	-0.254639	0.161559
SBP	Evangelou et al, 2018	rs112184198	10:100844757	-	-	No	0.7332	G	A	0.0977754	0.135548	0.356942	-1.40635	0.118775	-0.15173	0.368466	-0.401293	0.338858
SBP	Evangelou et al, 2018	rs1004467	10:102834750	CYP17A1	intron_variant	Yes	1.00023	A	G	0.111311	0.0884675	0.458672	1.09824	0.133522	-0.00635922	0.963338	-0.107502	0.729555
SBP	Evangelou et al, 2018	rs11191548	10:103086421	CNNM2	3_prime_UTR_variant	Yes	1.00009	T	C	0.0997058	0.105716	0.386967	1.04638	0.162631	0.027959	0.844378	-0.134798	0.680513
SBP	Evangelou et al, 2018	rs11197813	10:116764422	HSPA12A	intron_variant	No	0.9846	A	G	0.294512	0.01949	0.807747	0.234477	0.633143	0.0863118	0.334473	0.0267036	0.893322
SBP	Evangelou et al, 2018	rs11592107	10:121209450	-	-	No	0.97381	G	A	0.339063	0.0461878	0.549773	-0.760996	0.107693	0.0448942	0.591029	-0.0683589	0.72231
SBP	Evangelou et al, 2018	rs72834453	10:122475710	HTRA1	intron_variant	No	0.84978	T	G	0.116224	0.135676	0.288974	0.513923	0.512786	-0.0969838	0.501908	0.350143	0.229193
SBP	Evangelou et al, 2018	rs7912283	10:131959515	PPP2R2D	3_prime_UTR_variant	No	0.96221	A	G	0.34626	0.0609143	0.421487	-0.290098	0.532606	-0.0422526	0.61669	-0.0862997	0.65317
SBP	Evangelou et al, 2018	rs1133400	10:132645884	INPP5A	missense_variant	Yes	0.97266	A	G	0.177348	0.179441	0.0730135	0.0437061	0.943322	0.100865	0.380084	0.0256427	0.915475
SBP	Evangelou et al, 2018	rs661348	11:1884062	LSP1	intron_variant	No	0.88371	T	C	0.409527	-0.0315152	0.703998	0.291832	0.566381	0.0669945	0.477933	0.211101	0.301516
SBP	Evangelou et al, 2018	rs217727	11:1995678	-	-	Yes	0.99976	G	A	0.194096	0.164949	0.0737012	0.805811	0.154432	0.0500686	0.641985	0.320243	0.149803
SBP	Evangelou et al, 2018	rs10743086	11:8753376	DENND2B	intron_variant	No	0.87329	G	A	0.23051	-0.0304115	0.739898	-0.402194	0.473953	-0.141669	0.15858	-0.160547	0.498435
SBP	Evangelou et al, 2018	rs7129220	11:10328991	-	-	Yes	1.00007	G	A	0.0998683	0.127126	0.308744	1.30408	0.0884139	0.0921095	0.507154	0.102686	0.73026
SBP	Evangelou et al, 2018	rs1401454	11:16228637	SOX6	intron_variant	No	0.98748	C	T	0.383254	-0.0534185	0.470069	0.415203	0.359927	-0.0886232	0.32434	0.191887	0.293308
SBP	Evangelou et al, 2018	rs757081	11:17330136	NUCB2	missense_variant	No	0.94699	C	G	0.347287	0.093628	0.253002	-0.880017	0.0795646	-0.0439785	0.632875	-0.336164	0.117997
SBP	Evangelou et al, 2018	rs5219	11:17388025	KCNJ11	stop_gained	Yes	1.00023	C	T	0.375286	0.132153	0.0862309	-1.11091	0.0185655	-0.031849	0.707008	-0.267585	0.169008
SBP	Evangelou et al, 2018	rs10766533	11:19203130	CSRP3	upstream_gene_variant	No	0.75063	A	T	0.280029	-0.0529025	0.584214	-0.934438	0.114728	-0.130853	0.238917	-0.212392	0.413623
SBP	Evangelou et al, 2018	rs871004	11:28490911	-	-	Yes	1.00018	G	A	0.348159	0.0224938	0.773141	0.0249447	0.958425	-0.125656	0.158564	0.054422	0.779438
SBP	Evangelou et al, 2018	rs11031051	11:30334160	ARL14EP	intron_variant	No	0.95698	A	C	0.314863	0.0327817	0.685753	-0.352156	0.478271	0.00649156	0.941266	0.133941	0.491489
SBP	Evangelou et al, 2018	rs190194639	11:34046490	-	-	No	0.85662	C	T	0.0899403	0.0818458	0.571527	-0.644595	0.467688	-0.0268522	0.869041	0.0259766	0.941179
SBP	Evangelou et al, 2018	rs1585453	11:46863162	LRP4	intron_variant	No	0.92678	A	T	0.114716	-0.0242845	0.832011	-1.16668	0.0961248	-0.291621	0.0372038	0.422363	0.0818542
SBP	Evangelou et al, 2018	rs11537751	11:47565900	PTPMT1	splice_region_variant,splice_polypyrimidine_tract_variant,intron_variant	Yes	1.00021	C	T	0.0614596	0.143501	0.355027	1.19595	0.208527	0.0961843	0.559673	0.152711	0.64341
SBP	Evangelou et al, 2018	rs75905900	11:55346058	OR4A16	downstream_gene_variant	No	0.96751	A	C	0.111438	-0.103053	0.386099	-0.292574	0.688401	-0.225719	0.12138	-0.164048	0.596996
SBP	Evangelou et al, 2018	rs11229457	11:58439730	OR5B12	missense_variant	Yes	1.00021	C	T	0.202027	-0.140344	0.120406	0.156574	0.777782	-0.140794	0.178828	0.106797	0.627657
SBP	Evangelou et al, 2018	rs4980515	11:63977137	-	-	No	0.9741	C	T	0.485193	0.0203741	0.788495	0.456534	0.326696	-0.0270853	0.743349	0.0375065	0.840425
SBP	Evangelou et al, 2018	rs3741378	11:65641466	SIPA1	missense_variant	No	0.96303	C	T	0.130519	0.138162	0.228381	0.595351	0.397418	-0.0435835	0.75103	-0.100531	0.736081
SBP	Evangelou et al, 2018	rs67976715	11:68256274	-	-	No	0.8787	G	C	0.212766	0.0368521	0.699854	-0.0962373	0.869605	0.00160619	0.987916	-0.0647446	0.781805
SBP	Evangelou et al, 2018	rs7927515	11:76414286	-	-	Yes	1.00006	C	A	0.345894	-0.0668116	0.385747	-0.105069	0.824167	-0.0307113	0.721602	-0.221733	0.26095
SBP	Evangelou et al, 2018	rs4754196	11:107226051	-	-	No	0.99708	A	G	0.45754	0.0909914	0.208243	-0.0263404	0.952677	-0.00499805	0.95183	-0.0246325	0.889954
SBP	Evangelou et al, 2018	rs1076485	11:116901725	SIK3	intron_variant	No	0.92264	C	T	0.123478	-0.1641	0.162054	1.77515	0.0134695	-0.0976297	0.484239	0.327593	0.2142
SBP	Evangelou et al, 2018	rs78998485	12:325589	KDM5A	intron_variant	No	0.97695	C	G	0.243626	0.17685	0.040389	0.615093	0.245732	0.127209	0.195391	0.457939	0.0180772
SBP	Evangelou et al, 2018	rs11571376	12:950390	RAD52	upstream_gene_variant	No	0.93794	C	G	0.286261	0.0265858	0.74876	0.572696	0.260442	0.0673299	0.472249	0.197177	0.318714
SBP	Evangelou et al, 2018	rs2024385	12:12735504	APOLD1	intron_variant	No	0.86091	T	A	0.429667	0.15882	0.048527	0.398021	0.421125	-0.0213845	0.815832	0.171505	0.373665
SBP	Evangelou et al, 2018	rs28621435	12:13708056	GRIN2B	intron_variant	No	0.85465	G	A	0.115198	-0.12547	0.308057	1.20843	0.109201	-0.0363087	0.788177	-0.101384	0.74694
SBP	Evangelou et al, 2018	rs7976167	12:24057665	SOX5	intron_variant	No	0.994	T	C	0.322962	0.0252088	0.73327	-0.365845	0.419892	0.086566	0.269926	-0.141788	0.444864
SBP	Evangelou et al, 2018	rs73099903	12:53046995	TNS2	upstream_gene_variant	No	0.89168	C	T	0.0847488	-0.0766893	0.581196	1.11678	0.190269	-0.110403	0.481387	-0.106507	0.775969
SBP	Evangelou et al, 2018	rs7297416	12:54049306	HOXC4	upstream_gene_variant	No	0.9439	A	C	0.296137	-0.0739459	0.360048	-0.332667	0.502068	-0.10476	0.27311	0.186103	0.358635
SBP	Evangelou et al, 2018	rs10437954	12:57610139	ARHGEF25; DTX3	5 Prime UTR Variant (ARHGEF25); Downstream Variant (DTX3)	No	0.84928	A	G	0.0887932	-0.0841645	0.570215	0.403968	0.65673	0.038216	0.819487	-0.179211	0.644634
SBP	Evangelou et al, 2018	rs4143175	12:67388617	-	-	No	0.93892	C	T	0.245698	0.057456	0.522208	0.0239386	0.965332	0.0497312	0.614769	-0.201576	0.380996
SBP	Evangelou et al, 2018	rs7963801	12:79291446	SYT1	intron_variant	No	0.75945	C	T	0.397205	0.140235	0.109014	0.371374	0.489386	0.13128	0.200446	0.0775676	0.722506
SBP	Evangelou et al, 2018	rs17249754	12:89666809	ATP2B1	intron_variant	Yes	1.00017	G	A	0.159528	0.0439845	0.65956	-0.975642	0.110744	0.256856	0.0222901	-0.326652	0.249586
SBP	Evangelou et al, 2018	rs10858966	12:90173249	-	-	No	0.94156	G	C	0.291542	-0.0785805	0.342939	-0.263741	0.60405	-0.126805	0.187869	-0.0532801	0.798843
SBP	Evangelou et al, 2018	rs5742643	12:102444085	IGF1	intron_variant	No	0.95777	C	T	0.268601	-0.0144047	0.866096	0.480892	0.358536	0.0948878	0.330222	0.235432	0.256252
SBP	Evangelou et al, 2018	rs2384550	12:114914926	-	-	Yes	0.99762	G	A	0.385736	0.0702571	0.370134	-1.07313	0.025303	-0.0724003	0.411738	-0.347706	0.0779229
SBP	Evangelou et al, 2018	rs117206641	12:132510302	FBRSL1	intron_variant	No	0.90287	C	T	0.108989	0.127595	0.310507	0.751491	0.330305	0.111844	0.435876	-0.541488	0.157843
SBP	Evangelou et al, 2018	rs2480171	13:20985719	LATS2	intron_variant	No	0.99925	C	T	0.115873	0.101424	0.369126	0.546897	0.429722	0.190878	0.139992	-0.00687873	0.981338
SBP	Evangelou et al, 2018	rs606950	13:21724784	-	-	No	0.84973	A	G	0.371464	0.0515199	0.523369	-0.175055	0.723717	0.0212069	0.817336	0.0921466	0.644641
SBP	Evangelou et al, 2018	rs1331012	13:26541287	-	-	No	0.96718	G	T	0.260337	-0.0779253	0.36362	0.503223	0.339199	0.0736908	0.43153	-0.129999	0.545459
SBP	Evangelou et al, 2018	rs63418562	13:29572064	SLC7A1	intron_variant	No	0.9523	T	C	0.233883	0.0254363	0.77903	-0.155579	0.779622	0.0111541	0.914464	0.0177437	0.936408
SBP	Evangelou et al, 2018	rs9532243	13:31617271	-	-	No	0.98752	C	A	0.492751	-0.00373401	0.958495	-0.109068	0.804238	-0.0722661	0.363519	0.130851	0.460626
SBP	Evangelou et al, 2018	rs73187288	13:42164536	DGKH	intron_variant	No	0.97947	A	C	0.0883025	0.162049	0.222295	0.56988	0.484158	-0.0206276	0.891263	0.6944	0.0144901
SBP	Evangelou et al, 2018	rs912434	13:46615793	LRCH1	intron_variant	No	0.96821	T	G	0.241208	-0.0183528	0.83232	-1.53492	0.00376099	-0.121862	0.190837	-0.393591	0.0976226
SBP	Evangelou et al, 2018	rs9526707	13:50915050	RNASEH2B	intron_variant	No	0.95053	G	A	0.33135	-0.0983262	0.216032	0.273896	0.574331	-0.0558199	0.550002	0.0492871	0.806286
SBP	Evangelou et al, 2018	rs75961402	13:55824152	-	-	No	0.96579	G	A	0.140063	-0.0597369	0.583359	-0.0357995	0.957268	0.00548067	0.964446	0.246386	0.330949
SBP	Evangelou et al, 2018	rs7988232	13:79234520	-	-	No	0.94197	G	A	0.422056	-0.00574064	0.939845	0.248553	0.594074	-0.120546	0.155309	-0.426787	0.0286796
SBP	Evangelou et al, 2018	rs3011549	13:112980623	MCF2L	intron_variant	No	0.92511	C	A	0.277077	0.00594824	0.945148	0.787458	0.137015	-0.0585915	0.551633	-0.0264948	0.899707
SBP	Evangelou et al, 2018	rs7331680	13:114235175	CDC16	intron_variant	No	0.97159	G	T	0.127241	-0.0158326	0.885656	-0.126775	0.851081	0.0206403	0.866422	0.291397	0.236211
SBP	Evangelou et al, 2018	rs17115145	14:29653203	PRKD1	intron_variant	No	0.96728	C	T	0.395813	0.0762692	0.326899	-0.707107	0.138208	0.0110677	0.90119	-0.0927933	0.63766
SBP	Evangelou et al, 2018	rs34983854	14:39389238	MIA2	downstream_gene_variant	No	0.98425	A	G	0.383257	-0.0114209	0.880707	0.0267713	0.954251	0.0237356	0.780886	0.172728	0.354178
SBP	Evangelou et al, 2018	rs9888615	14:52910822	FERMT2	intron_variant	No	0.98203	C	T	0.295963	0.0702842	0.393165	0.629786	0.212231	0.200074	0.0265676	-0.231161	0.288609
SBP	Evangelou et al, 2018	rs8016306	14:63461828	PPP2R5E	intron_variant	No	0.96974	A	G	0.230808	-0.22214	0.0128779	0.0138122	0.979939	-0.0524073	0.606247	-0.117439	0.606736
SBP	Evangelou et al, 2018	rs11623535	14:71995664	RGS6	intron_variant	No	0.99233	A	G	0.264984	0.0987866	0.251985	-1.13767	0.0311941	-0.0426348	0.663607	-0.501359	0.0372779
SBP	Evangelou et al, 2018	rs11159091	14:74607613	LTBP2	intron_variant	No	0.93845	G	A	0.463094	0.0978326	0.196944	0.678786	0.144278	0.0287708	0.734071	0.259282	0.163394
SBP	Evangelou et al, 2018	rs8014182	14:103393625	MARK3	intron_variant	No	0.90873	C	T	0.145732	0.0100931	0.929584	0.0772307	0.91224	0.0700602	0.572753	-0.146042	0.610453
SBP	Evangelou et al, 2018	rs11629850	15:40024874	EIF2AK4	intron_variant	No	0.99185	A	G	0.466401	-0.0338897	0.639779	0.535293	0.227754	0.0361767	0.670021	-0.261837	0.15672
SBP	Evangelou et al, 2018	rs11634028	15:75983809	NRG4	intron_variant	No	0.62872	T	A	0.193711	-0.0108417	0.925222	1.31261	0.0635557	-0.109332	0.406728	-0.0488734	0.866993
SBP	Evangelou et al, 2018	rs2759308	15:80723886	ABHD17C	intron_variant	No	0.94993	G	A	0.468957	0.001682	0.982502	0.825148	0.0789592	0.154234	0.0826241	0.108695	0.559044
SBP	Evangelou et al, 2018	rs3743157	15:85137301	PDE8A	intron_variant	Yes	0.99966	C	A	0.181268	-0.0217816	0.821069	0.190857	0.746584	0.0521195	0.623297	-0.159437	0.526683
SBP	Evangelou et al, 2018	rs11632436	15:85752055	AKAP13	downstream_gene_variant	No	0.96161	G	C	0.484023	-0.0943408	0.209855	0.542512	0.239788	0.14076	0.114706	-0.311522	0.096975
SBP	Evangelou et al, 2018	rs4965529	15:99605019	MEF2A	intron_variant	No	0.97135	C	A	0.176072	-0.0180004	0.854473	-0.81992	0.172798	0.0230078	0.833756	-0.184047	0.496292
SBP	Evangelou et al, 2018	rs2379829	16:3488873	-	-	No	0.96965	C	G	0.308594	0.0182425	0.82317	0.366136	0.464434	-0.0912308	0.330004	-0.0194321	0.923962
SBP	Evangelou et al, 2018	rs35450617	16:6839674	RBFOX1	intron_variant	No	0.92658	T	G	0.319022	0.0573881	0.502462	-0.478001	0.362276	0.00365507	0.970021	0.0214028	0.91851
SBP	Evangelou et al, 2018	rs34941092	16:50516226	-	-	No	0.79056	G	A	0.147585	-0.0630504	0.578593	-0.542086	0.436154	0.106677	0.406853	0.288091	0.305739
SBP	Evangelou et al, 2018	rs1012089	16:74138074	-	-	No	0.94272	G	C	0.452469	-0.0435577	0.569136	-0.221933	0.636251	-0.187127	0.0280867	0.0134395	0.941934
SBP	Evangelou et al, 2018	rs7187540	16:85284696	GSE1	intron_variant	No	0.79789	C	A	0.322528	-0.0150485	0.866331	-0.274981	0.615986	0.12742	0.175766	0.118781	0.582407
SBP	Evangelou et al, 2018	rs3851018	16:86404205	-	-	No	0.77888	C	G	0.404375	-0.00379225	0.964515	0.478581	0.359767	-0.0452914	0.637973	-0.0969837	0.649354
SBP	Evangelou et al, 2018	rs6540125	16:87960283	BANP	intron_variant	No	0.97749	G	T	0.360753	-0.074611	0.33912	0.357363	0.4554	-0.0559558	0.522709	0.104067	0.589215
SBP	Evangelou et al, 2018	rs4480845	17:2055315	HIC1	intron_variant	No	0.83838	C	T	0.385333	0.0552649	0.498653	0.153949	0.758667	0.192765	0.0512285	0.289367	0.14328
SBP	Evangelou et al, 2018	rs4925159	17:18282196	TOP3A	intron_variant	Yes	1.00021	G	A	0.418604	0.0155547	0.837949	-0.475157	0.307976	-0.0372703	0.65478	-0.0718855	0.698771
SBP	Evangelou et al, 2018	rs1551355	17:31705401	-	-	No	0.94399	C	T	0.245893	-0.0140797	0.875013	-0.401465	0.464526	-0.257506	0.0144218	-0.466685	0.0719371
SBP	Evangelou et al, 2018	rs9899540	17:32450906	PSMD11	intron_variant	No	0.87149	T	A	0.382063	0.107185	0.203436	-0.062725	0.903515	0.144928	0.122971	0.39572	0.0530268
SBP	Evangelou et al, 2018	rs12946454	17:45130754	PLCD3	intron_variant	Yes	1.0001	A	T	0.254658	-0.0991689	0.248232	-0.296329	0.573883	0.01901	0.837724	-0.115452	0.585711
SBP	Evangelou et al, 2018	rs7406910	17:48610894	HOXB7	missense_variant	Yes	0.9993	C	T	0.079112	0.031983	0.8081	-0.421998	0.601393	0.124066	0.383148	0.0248736	0.934573
SBP	Evangelou et al, 2018	rs34430710	17:58799266	PPM1E	intron_variant	No	0.9702	A	T	0.323272	-0.0779104	0.328037	0.0434886	0.929117	-0.166613	0.0677388	-0.213276	0.290553
SBP	Evangelou et al, 2018	rs1036902	17:60873430	BCAS3	intron_variant	No	0.93165	T	C	0.183193	0.147091	0.146292	0.491579	0.428883	0.0111214	0.92252	0.212938	0.371192
SBP	Evangelou et al, 2018	rs2240736	17:61408032	TBX2	intron_variant	No	0.97136	T	C	0.282439	0.26915	0.00097846	0.295132	0.557544	0.297163	0.000754169	0.284344	0.137414
SBP	Evangelou et al, 2018	rs6504213	17:64304354	-	-	No	0.87423	C	T	0.414996	-0.00724285	0.924873	1.03891	0.0271282	-0.00486453	0.957328	0.1028	0.588475
SBP	Evangelou et al, 2018	rs112260610	17:66256275	APOH	intron_variant	No	0.95412	C	T	0.139017	0.144933	0.198426	-1.14882	0.0962674	-0.248444	0.0617909	0.424332	0.105931
SBP	Evangelou et al, 2018	rs9302885	17:78803816	USP36	synonymous_variant	No	0.99903	G	A	0.439377	-0.0402633	0.580181	-0.279976	0.530453	0.0404917	0.626247	0.057714	0.750203
SBP	Evangelou et al, 2018	rs112280096	17:81393609	BAHCC1	upstream_gene_variant	No	0.81566	C	A	0.354804	-0.121679	0.158511	-0.330112	0.533079	0.07891	0.411412	-0.146438	0.500532
SBP	Evangelou et al, 2018	rs34413141	18:777281	YES1	intron_variant	No	0.83946	T	A	0.185016	-0.0998341	0.322926	-0.292158	0.637363	-0.00104321	0.99271	-0.800497	0.0162537
SBP	Evangelou et al, 2018	rs1154214	18:26966860	CHST9	intron_variant	No	0.99911	G	T	0.399389	-0.00828437	0.915197	0.265159	0.578412	0.323468	0.000190476	0.158284	0.397622
SBP	Evangelou et al, 2018	rs12958173	18:44562012	-	-	No	0.98	C	A	0.306548	-0.00356551	0.964583	-0.396207	0.420924	-0.120609	0.211703	-0.39436	0.0724317
SBP	Evangelou et al, 2018	rs11876341	18:51273621	-	-	No	0.80938	A	G	0.295932	-0.098257	0.2727	-0.409241	0.456447	-0.246303	0.0110398	-0.0839104	0.703371
SBP	Evangelou et al, 2018	rs10048404	18:56911251	WDR7	intron_variant	No	0.5761	C	T	0.359122	0.0373743	0.705869	-0.249925	0.680685	0.0735917	0.520618	0.0209563	0.933524
SBP	Evangelou et al, 2018	rs6567160	18:60161902	-	-	No	0.98101	T	C	0.248844	0.0783573	0.357773	0.211658	0.685622	0.207144	0.0295113	0.289302	0.160799
SBP	Evangelou et al, 2018	rs10460108	18:75322196	-	-	No	0.95275	G	A	0.457075	0.014506	0.845044	0.491698	0.279665	0.0264543	0.744282	0.0542443	0.762362
SBP	Evangelou et al, 2018	rs2613765	19:5066319	KDM4B	intron_variant	No	0.89904	G	A	0.457154	0.0151102	0.845534	0.639017	0.178875	0.0691829	0.441814	-0.0167841	0.931338
SBP	Evangelou et al, 2018	rs10409243	19:10222312	DNMT1	intron_variant	No	0.78744	T	C	0.449501	0.165005	0.0434527	0.477967	0.340946	0.111168	0.230853	0.00687088	0.972431
SBP	Evangelou et al, 2018	rs17638167	19:11474003	ELAVL3	intron_variant	No	0.7288	C	T	0.0568786	0.0515241	0.781738	1.40929	0.216204	-0.0370101	0.855954	-0.633119	0.278951
SBP	Evangelou et al, 2018	rs8105753	19:31436641	-	-	No	0.68477	A	C	0.406502	-0.0144315	0.875113	0.919243	0.102186	0.0603099	0.559332	0.14999	0.496961
SBP	Evangelou et al, 2018	rs7256564	19:33398687	PEPD	intron_variant	No	0.99041	G	A	0.297779	0.00460967	0.953947	0.111433	0.819993	-0.0513868	0.566258	0.11259	0.55526
SBP	Evangelou et al, 2018	rs73046792	19:49102448	SNRNP70	intron_variant	No	0.81096	G	A	0.132447	-0.022413	0.851326	0.861451	0.239902	-0.152978	0.290972	-0.104338	0.741359
SBP	Evangelou et al, 2018	rs1764975	20:4120643	-	-	No	0.99067	A	T	0.195788	-0.0189149	0.848875	-0.354905	0.5598	0.301436	0.00696669	-0.0320585	0.896418
SBP	Evangelou et al, 2018	rs6031435	20:44168718	JPH2	intron_variant	No	0.92374	A	G	0.484503	0.0486292	0.527907	-0.519755	0.271239	-0.0511345	0.556099	-0.279722	0.14114
SBP	Evangelou et al, 2018	rs6021247	20:51492442	NFATC2	intron_variant	Yes	0.99814	A	G	0.468975	0.00614123	0.932239	-0.14887	0.736834	-0.0607361	0.451581	0.0629045	0.719273
SBP	Evangelou et al, 2018	rs1882961	21:15184047	-	-	No	0.89797	C	T	0.300779	-0.0129024	0.882302	0.301424	0.572642	0.0784778	0.430657	-0.00167071	0.993814
SBP	Evangelou et al, 2018	rs11701033	21:32416033	EVA1C	intron_variant	No	0.94766	C	G	0.191313	-0.0759913	0.418067	0.479941	0.404333	-0.148118	0.189443	-0.511853	0.0753393
SBP	Evangelou et al, 2018	rs9608690	22:28525359	TTC28	intron_variant	No	0.94013	G	A	0.070083	-0.107137	0.470558	-0.113999	0.900393	-0.263	0.154288	-0.22315	0.580648
SBP	Evangelou et al, 2018	rs28578714	22:50289492	PLXNB2	intron_variant	No	0.98675	T	C	0.422928	0.0759449	0.332956	-0.126327	0.793104	-0.0554789	0.543027	-0.167396	0.39537
DR	Grassi et al, 2011	rs476141	1:244013122	-	-	No	0.91766	G	T	0.468117	-0.132528	0.0869297	0.14122	0.766537	0.0655353	0.443422	-0.15181	0.436695
DR	Hosseini et al, 2015	rs1801282	3:12351626	PPARG	intron_variant	Yes	1.00009	C	G	0.136483	0.096391	0.367292	1.30994	0.0453588	0.00246076	0.983806	-0.0779685	0.777862
DR	Pollack et al, 2019	rs17706958	3:73787990	-	-	No	0.7922	T	C	0.218951	0.0225318	0.824918	0.909813	0.144845	-0.0510619	0.659724	-0.131908	0.612098
DR	Pollack et al, 2019	rs426500	5:123131621	PRDM6	intron_variant	No	0.98958	C	T	0.277216	0.0218367	0.79599	-0.524271	0.311223	0.0177733	0.846158	-0.197074	0.368485
DR	Pollack et al, 2019	rs12174773	6:4695553	-	-	No	0.99708	T	C	0.339481	0.0642524	0.415022	-0.814005	0.0918518	-0.0525483	0.558245	0.0340193	0.859666
DR	Pollack et al, 2019	rs2699116	7:9176856	-	-	No	0.96436	A	G	0.100604	0.10057	0.434515	0.551602	0.48479	0.0287354	0.844201	0.102074	0.751823
DR	Hosseini et al, 2015	rs1571942	10:20253705	PLXDC2	intron_variant	Yes	0.9995	A	G	0.150056	-0.0321729	0.763477	-0.295667	0.652025	0.283102	0.017459	0.104161	0.6946
DR	Pollack et al, 2019	rs7944308	11:30032912	-	-	No	0.92332	T	G	0.45821	-0.0586147	0.450472	-0.548798	0.249339	0.021377	0.804279	-0.19484	0.324362
DR	Pollack et al, 2019	rs1601780	13:82983623	-	-	No	0.93011	G	A	0.0879287	0.125526	0.357575	2.01963	0.0155131	0.175918	0.248609	-0.745809	0.109654
DR	Grassi et al, 2011	rs4787008	16:7365551	RBFOX1	intron_variant	Yes	0.99788	G	A	0.180931	0.0806329	0.388423	-0.037887	0.94733	0.203833	0.0601039	0.291209	0.1748
DR	Burdon et al, 2015	rs9896052	17:75422781	-	-	No	0.86006	C	A	0.360104	0.0994474	0.227952	-0.718895	0.155234	-0.000861138	0.992391	0.136567	0.50065
DR	Pollack et al, 2019	rs9905843	17:76873569	MGAT5B	intron_variant	No	0.90273	C	T	0.39158	-0.0600813	0.433821	-0.271927	0.563534	-0.170014	0.0596462	0.11076	0.547651
DR	Pollack et al, 2019	rs6038419	20:6313407	-	-	No	0.96104	A	T	0.0999178	0.0357355	0.779526	0.46015	0.556596	-0.0644044	0.638285	-0.019955	0.951656
DN	Salem et al, 2019	rs12615970	2:3697625	ALLC	intron_variant	No	0.71392	A	G	0.120771	-0.15655	0.250127	1.6602	0.0464432	-0.0147885	0.923385	-0.197026	0.579839
DN	Salem et al, 2019	rs55703767	2:227256385	COL4A3	missense_variant	Yes	0.99911	G	T	0.207373	-0.00779561	0.930326	-0.928271	0.0892114	-0.17563	0.0956737	-0.472884	0.0638782
DN (DR)	Hosseini et al, 2015	rs11723864	4:173653255	-	-	No	0.66504	C	G	0.0848766	-0.189382	0.240417	0.42992	0.664077	-0.0119655	0.944582	-0.459164	0.299196
DN (DR)	Hosseini et al, 2015	rs39059	7:29215854	CHN2	intron_variant	No	0.98612	A	G	0.371353	0.0903391	0.233735	-0.0859091	0.853624	0.15267	0.072572	0.078287	0.675574
DN (DR)	Hosseini et al, 2015	rs10808565	8:127995166	-	-	No	0.99937	C	T	0.347393	0.108351	0.15221	-0.131238	0.777551	0.0972919	0.246382	0.142445	0.461985
DN (DR)	Hosseini et al, 2015	rs1411766	13:109599813	-	-	No	0.84859	G	A	0.326354	0.13618	0.106485	-1.48843	0.00392963	0.0367069	0.683257	-0.092453	0.668019
DN	Salem et al, 2019	rs61983410	14:25535506	-	-	No	0.89979	T	C	0.190504	-0.0949353	0.322913	0.434481	0.460854	0.0671649	0.548659	-0.547275	0.0642932
DN (DR)	Hosseini et al, 2015	rs1018534	14:100653897	-	-	Yes	0.9982	G	T	0.315392	0.144342	0.0636806	0.270309	0.571973	0.025708	0.781772	-0.0671549	0.733783
DN (DR)	Hosseini et al, 2015	rs1467537	14:100654937	-	-	No	0.93144	C	T	0.290481	0.134459	0.112938	0.151181	0.771763	0.0975732	0.323279	-0.144872	0.49983
